# Supplementary material for: A distinct response to endogenous DNA damage in the development of Nbs1-deficient cortical neurons
Source: PubMed Central journal article supplement — Cell Res. 2012 Jan 3;22(5):859–72. doi: 10.1038/cr.2012.3 (PMC3343649; doi:10.1038/cr.2012.3), 2012-01-03
Supplement: cr20123x1.pdf [file cr20123x1.pdf]

## Supplementary information, Figure S1

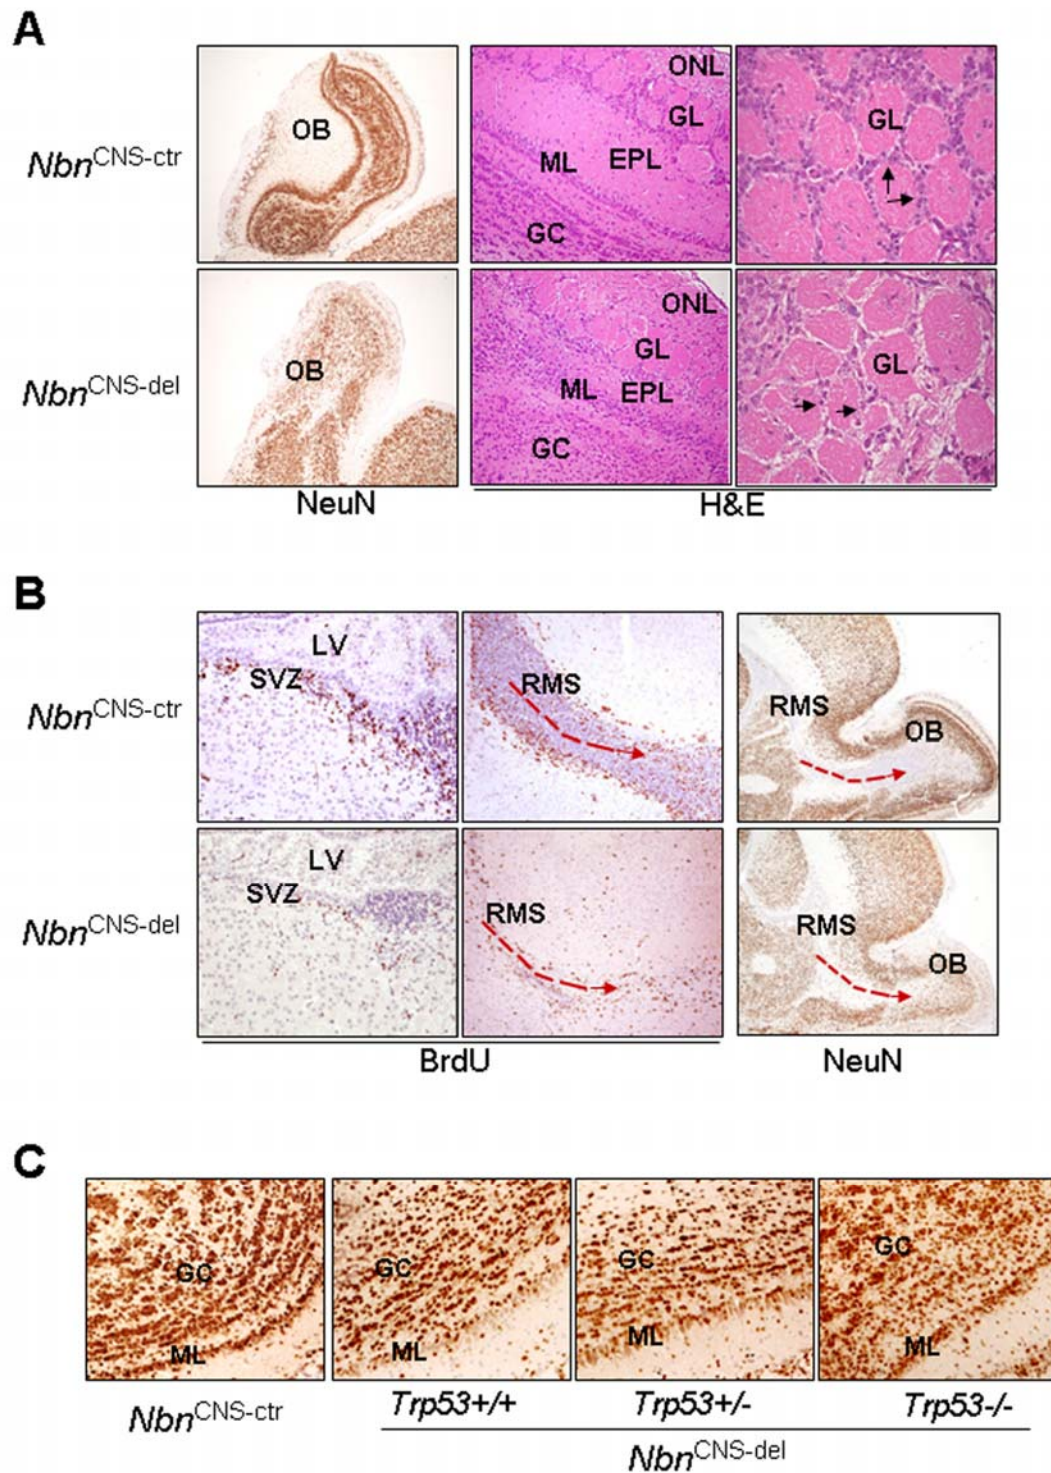

**Figure S1** Nbs1 deficiency disrupted laminar structure and reduced cellularity of olfactory bulb. (A) NeuN and H&E immunostaining of olfactory bulb. OB, olfactory bulb; ONL, olfactory nerve layer; GL, glomerular layer; EPL, external plexiform

layer; ML, mitral cell layer; GC, granule cell layer; Periglomerular neurons (arrows). Original magnification, left panel  $\times 4$ , middle panel  $\times 20$ , right panel  $\times 40$ . **(B)** *In vivo* analysis of olfactory genesis. BrdU pulse-labeling of progenitor of olfactory neurons at P7 subventricular zone (SVZ, left panel, original magnification  $\times 40$ ) and rostral migratory stream (RMS, middle panel, original magnification  $\times 4$ ). LV, lateral ventricle. Immature neurons in the rostral migratory stream showing negative staining for NeuN in the right panel. Original magnification  $\times 4$ . **(C)** NeuN staining of olfactory bulb showing that *Trp53* mutations partly rescue the laminar structure and increase cellularity of olfactory bulb. Original magnification  $\times 10$ .
