# Supplementary material for: A distinct response to endogenous DNA damage in the development of Nbs1-deficient cortical neurons
Source: PubMed Central journal article supplement — Cell Res. 2012 Jan 3;22(5):859–72. doi: 10.1038/cr.2012.3 (PMC3343649; doi:10.1038/cr.2012.3), 2012-01-03
Supplement: cr20123x2.pdf [file cr20123x2.pdf]

**Supplementary information, Figure S2**

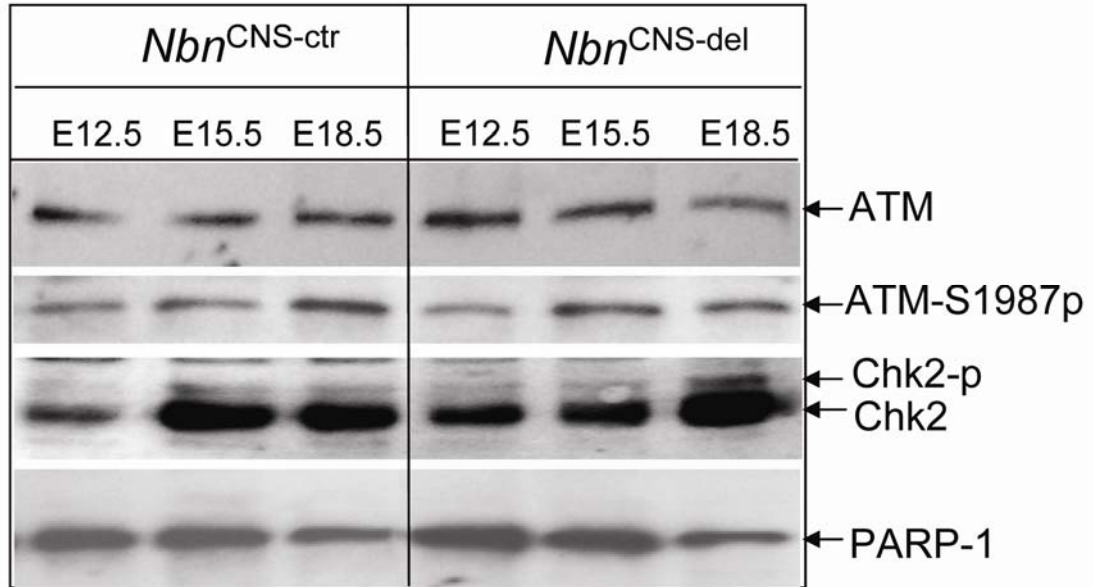

**Figure S2** Western blot analysis of ATM and Chk2 in Nbs1-deficient developing brain.

PARP-1 was used as loading control.
