# Supplementary material for: A distinct response to endogenous DNA damage in the development of Nbs1-deficient cortical neurons
Source: PubMed Central journal article supplement — Cell Res. 2012 Jan 3;22(5):859–72. doi: 10.1038/cr.2012.3 (PMC3343649; doi:10.1038/cr.2012.3), 2012-01-03
Supplement: cr20123x3.pdf [file cr20123x3.pdf]

### Supplementary information, Figure S3

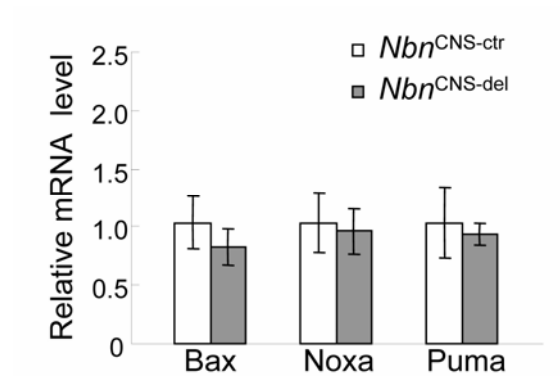

**Figure S3** Nbs1 deficiency has no obvious effect on expression levels of p53-mediated proapoptotic target genes *Bax*, *Noxa*, *Puma* in P7 Nbs1-deficient cerebral cortex. At least 6 mice of each genotype were analyzed. Error bar, mean  $\pm$  S.E.M. (*t* test).
